# Supplementary material
Source: HighWire-hosted journal article supplement (https://www.ghspjournal.org/highwire/filestream/5919/field_highwire_adjunct_files/0/GHSP-D-21-00657-supplement.pdf)
Supplement: GHSP-D-21-00657-supplement.pdf [file GHSP-D-21-00657-supplement.pdf]

**Supplement Table 1: TSV and Mystery client scenario 1 (ask provider for recommendation on contraceptive method) comparison: Assessing client needs and eligibility**

| Variables                                                                                                                                        | Mystery client |                     |     | Technical Support visit |                     |                | Know-do gap |                     |
|--------------------------------------------------------------------------------------------------------------------------------------------------|----------------|---------------------|-----|-------------------------|---------------------|----------------|-------------|---------------------|
|                                                                                                                                                  | %              | Confidence interval | N   | %                       | Confidence interval | N <sup>1</sup> |             | Confidence interval |
| Client Needs                                                                                                                                     |                |                     |     |                         |                     |                |             |                     |
| Currently using any FP methods                                                                                                                   | 69.2           | 63.6-74.4           | 206 | 79                      | 71.4-85             | 92             | 13.6*       | 2.2-25              |
| Postpartum                                                                                                                                       | 7.3            | 5.2-10.1            | 206 | 36.6                    | 28.4-45.6           | 92             | 26.6***     | 16.6-36.7           |
| Plans for additional children                                                                                                                    | 43             | 37.4-48.9           | 206 | 85.5                    | 80.6-89.3           | 205            | 42.3***     | 34.6-50.1           |
| Medical Eligibility                                                                                                                              |                |                     |     |                         |                     |                |             |                     |
| Time of last menstrual period                                                                                                                    | 55.1           | 49-61.1             | 206 | 96.4                    | 92-98.4             | 92             | 37.3***     | 28.3-46.3           |
| Abnormal breast lumps or breast cancer                                                                                                           | 10.5           | 7.7-14.3            | 206 | 76.9                    | 71.8-81.3           | 204            | 66.3***     | 60.4-72.1           |
| Unexplained vaginal bleeding                                                                                                                     | 8.1            | 5.6-11.5            | 206 | 82.2                    | 76.9-86.5           | 204            | 74***       | 68.3-79.7           |
| Currently taking any medication                                                                                                                  | 19.6           | 15.7-24.2           | 206 | 94.2                    | 89.4-96.9           | 113            | 84.3***     | 79-89.7             |
| Took blood pressure                                                                                                                              | 3.7            | 2.2-6.3             | 206 | 95.4                    | 92.7-97.1           | 204            | 91.7***     | 88.7-94.6           |
| * = $p < 0.05$ , ** = $p < 0.01$ , *** $p < 0.001$ ; $p$ -values calculated using $t$ -test on paired values; $N$ is the number of observations. |                |                     |     |                         |                     |                |             |                     |

<sup>1</sup> The number of observations varies for the TSV data because the TSV checklist was revised during the period in which TSVs analyzed for this study were collected. Consequently, although we compared the same 414 facilities, the TSV denominator for certain questions was less than 414 because the previous version of the TSV checklist did not have a comparable variable to the mystery client survey for those questions. N of TSVs is split between Tables 1 and 2 to compare more accurately against the N of the two scenarios.

**Supplement Table 2: TSV and Mystery client scenario 2 (ask provider for oral contraceptives) comparison: Assessing client needs and eligibility**

| Variables                                                                                                                                        | Mystery client |                     |     | Technical Support visit |                     |                | Know-do gap |                     |
|--------------------------------------------------------------------------------------------------------------------------------------------------|----------------|---------------------|-----|-------------------------|---------------------|----------------|-------------|---------------------|
|                                                                                                                                                  | %              | Confidence interval | N   | %                       | Confidence interval | N <sup>2</sup> |             | Confidence interval |
| Client Needs                                                                                                                                     |                |                     |     |                         |                     |                |             |                     |
| Currently using any FP methods                                                                                                                   | 66.3           | 60.4-71.7           | 208 | 77.7                    | 70.4-83.7           | 95             | 10.9        | -0.1-21.8           |
| Postpartum                                                                                                                                       | 6.4            | 4.4-9.1             | 208 | 32.8                    | 25.2-41.6           | 95             | 21.3***     | 11.5-31.2           |
| Plans for additional children                                                                                                                    | 40.5           | 34.8-46.4           | 208 | 83.7                    | 78.5-87.8           | 204            | 44***       | 36.3-51.6           |
| Eligibility                                                                                                                                      |                |                     |     |                         |                     |                |             |                     |
| Time of last menstrual period                                                                                                                    | 57.9           | 51.7-63.8           | 208 | 93.9                    | 87.3-97.2           | 95             | 36.4***     | 25.7-47.1           |
| Abnormal breast lumps or breast cancer                                                                                                           | 14.8           | 11.3-19.2           | 208 | 76.1                    | 70.6-80.8           | 204            | 61.3***     | 55-67.6             |
| Unexplained vaginal bleeding                                                                                                                     | 8.3            | 5.8-11.7            | 208 | 81.8                    | 76.5-86.2           | 205            | 73.7***     | 68.2-79.3           |
| Currently taking any medication                                                                                                                  | 28.8           | 24.2-33.8           | 208 | 91.2                    | 85-95               | 110            | 71.5***     | 64.1-78.9           |
| Took blood pressure                                                                                                                              | 3.9            | 2-7.3               | 208 | 92.9                    | 89.9-95             | 204            | 89***       | 85.5-92.4           |
| * = $p < 0.05$ , ** = $p < 0.01$ , *** $p < 0.001$ ; $p$ -values calculated using $t$ -test on paired values; $N$ is the number of observations. |                |                     |     |                         |                     |                |             |                     |

<sup>2</sup> The number of observations varies for the TSV data because the TSV checklist was revised during the period in which TSVs analyzed for this study were collected. Consequently, although we compared the same 414 facilities, the TSV denominator for certain questions was less than 414 because the previous version of the TSV checklist did not have a comparable variable to the mystery client survey for those questions. N of TSVs is split between Tables 1 and 2 to compare more accurately against the N of the two scenarios.
